# Supplementary material for: People’s perceptions on COVID-19 vaccination: an analysis of twitter discourse from four countries
Source: Springer Nature journal article supplement (doi:10.1038/s41598-023-41478-7), 2023-08-31
Supplement: MOESM1 [file 41598_2023_41478_MOESM1_ESM.pdf]

# Title: People's perceptions on COVID-19 vaccination: An Analysis of twitter discourse from four countries

**Supplementary File:** Trends in COVID-19 deaths and Vaccine doses in the countries studied.

A

B

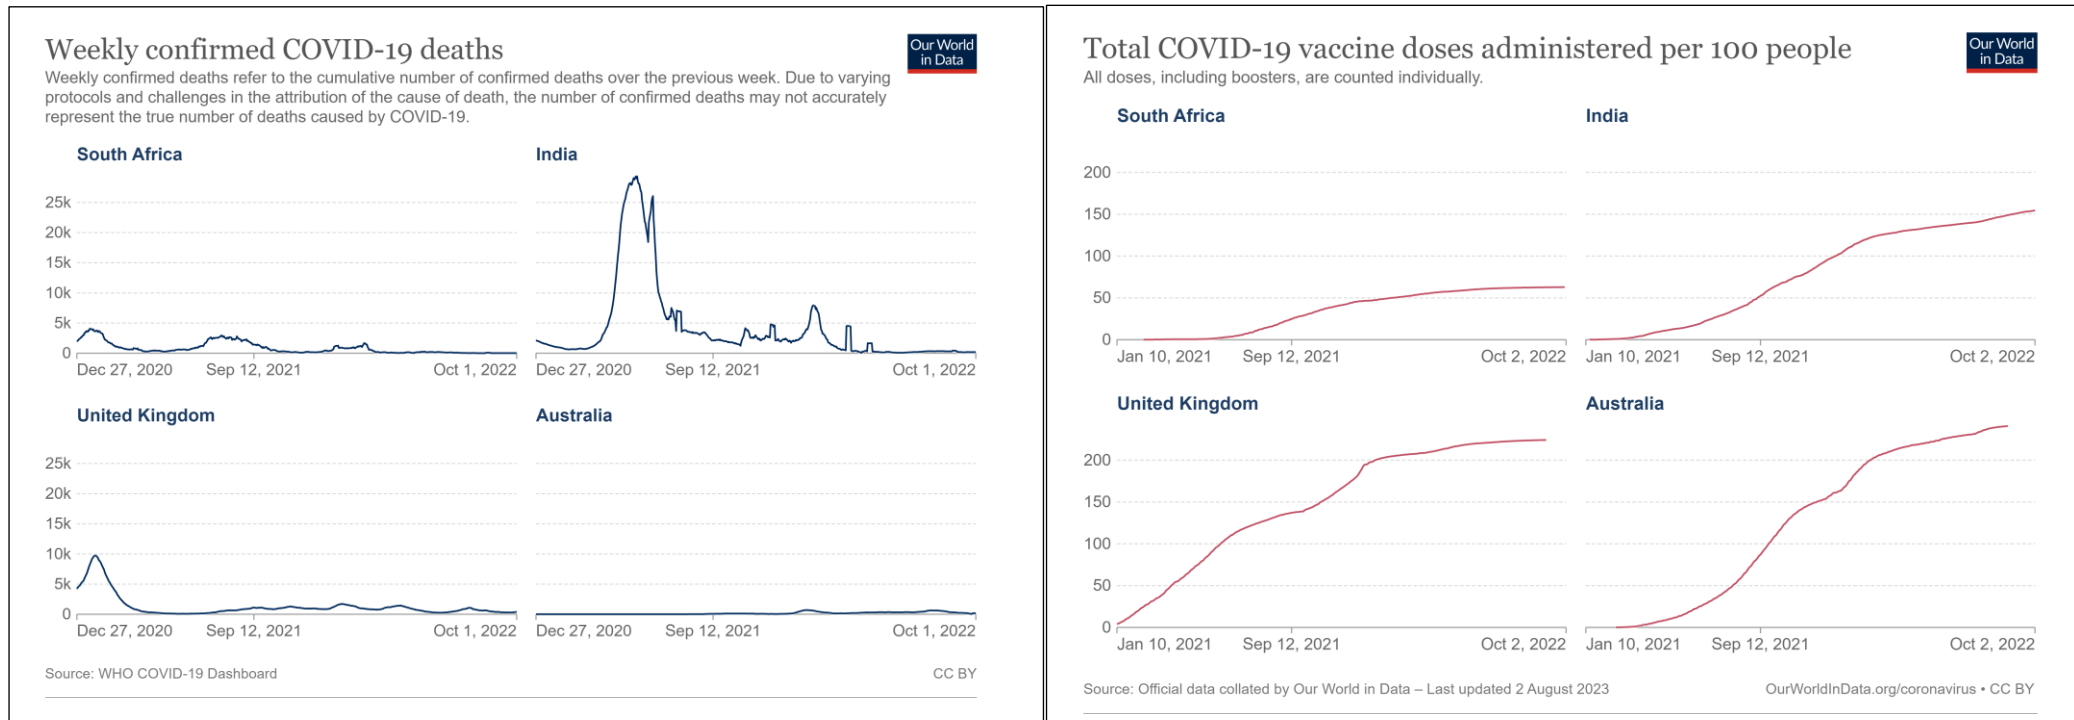

**Source:** Edouard Mathieu, Hannah Ritchie, Lucas Rodés-Guirao, Cameron Appel, Charlie Giattino, Joe Hasell, Bobbie Macdonald, Saloni Dattani, Diana Beltekian, Esteban Ortiz-Ospina and Max Roser (2020) - "Coronavirus Pandemic (COVID-19)". Published online at OurWorldInData.org. Retrieved from: <https://ourworldindata.org/coronavirus> [Online Resource]
